# Supplementary material for: Revealing the Regulatory Mechanism of lncRNA-LMEP on Melanin Deposition Based on High-Throughput Sequencing in Xichuan Chicken Skin
Source: MDPI journal article supplement (doi:10.3390/genes13112143), 2022-11-17
Supplement: s1 [file s1]

**Table S3.** Characteristics of the reads from the six chicken skin libraries

| Sample ID | Total Reads | Clean Reads | Clean Bases   | GC Content | %≥Q30  | Mapped Reads           | Unique Mapped Reads    |
|-----------|-------------|-------------|---------------|------------|--------|------------------------|------------------------|
| YS-1      | 44,986,754  | 22,493,377  | 6,597,527,610 | 53.88%     | 86.44% | 31,297,357<br>(69.57%) | 29,280,025<br>(65.09%) |
| YS-2      | 45,862,450  | 22,931,225  | 6,701,085,310 | 54.56%     | 86.31% | 31,819,922<br>(69.38%) | 29,426,178<br>(64.16%) |
| YS-3      | 48,078,912  | 24,039,456  | 6,987,809,848 | 54.37%     | 86.14% | 33,405,703<br>(69.48%) | 30,410,773<br>(63.25%) |
| BS-1      | 44,092,374  | 22,046,187  | 6,429,548,622 | 54.23%     | 86.54% | 31,006,065<br>(70.32%) | 27,441,291<br>(62.24%) |
| BS-2      | 44,136,294  | 22,068,147  | 6,441,323,382 | 54.50%     | 86.07% | 30,517,393<br>(69.14%) | 28,149,679<br>(63.78%) |
| BS-3      | 48,775,554  | 24,387,777  | 7,148,900,028 | 55.14%     | 86.66% | 34,422,875<br>(70.57%) | 30,204,318<br>(61.93%) |

Note: YS represents the yellow skin group, and BS represents the black skin group. Mapped Reads indicates the percent of mapped reads among all reads. Unique mapped Reads represents matched the reference genome in only one position.
