# Supplementary material for: Revealing the Regulatory Mechanism of lncRNA-LMEP on Melanin Deposition Based on High-Throughput Sequencing in Xichuan Chicken Skin
Source: MDPI journal article supplement (doi:10.3390/genes13112143), 2022-11-17
Supplement: s1 [file s1]

**Table S5.** IncLocator prediction result

| Predicted location | Score      |
|--------------------|------------|
| Cytoplasm          | 0.85506516 |
| Nucleus            | 0.08972716 |
| Ribosome           | 0.01153811 |
| Cytosol            | 0.0344919  |
| Exosome            | 0.00917767 |
