# Supplementary material for: Revealing the Regulatory Mechanism of lncRNA-LMEP on Melanin Deposition Based on High-Throughput Sequencing in Xichuan Chicken Skin
Source: MDPI journal article supplement (doi:10.3390/genes13112143), 2022-11-17
Supplement: s1 [file s1]

**Table S1.** Information of primers sequences

| Gene                           | Primer sequence<br>(5'-3')                                  | Tm<br>(°C) | Product<br>(bp) | Application |                |
|--------------------------------|-------------------------------------------------------------|------------|-----------------|-------------|----------------|
| F1                             | GCGGTGGGTGTTTCAGCATGG                                       | 60         | 1579            | RACE        |                |
| R1                             | CATGCACCCACGTGCACTGT                                        |            |                 |             |                |
| F2                             | CAGAGTAGGACGTGGTTCGG                                        | 60         | 1476            |             |                |
| R2                             | TGTAAATCCTGGTGATAGCC                                        |            |                 |             |                |
| 3'-F                           | GAATCGAGACAACTACACAGCACT                                    | 55         | 1600            |             |                |
| 5'-R                           | GACTTGAAGCCGCCACGTACATCT                                    | 55         | 350             |             |                |
| ATP5E                          | TGAACAGTCTTCCAGCGTGC<br>CAGGTGCACAGAAGTTCGTC                | 60         | 249             | qRT-PCR     |                |
| SLMO2                          | GAAGCCTTCAGGCAATGCAC<br>TCGCACGTTACACAGAGGTC                | 60         | 163             |             |                |
| TYR                            | TTGACAGCATTTTTGAGCGGTG<br>CTGATGGGCTTGCTTGAGGT              | 60         | 198             |             |                |
| EDN3                           | TCAACACCCCAGAGAGGACT<br>GCAAACGTTAAACCTTCTTCTGTC            | 60         | 179             |             |                |
| TCONS_00070                    | CGGTTAAGGCACAACCTGGAA                                       | 60         | 176             |             |                |
| 905                            | CTTTCCTGAGGGGCATT                                           |            |                 |             |                |
| TCONS_00072                    | AGGGTGACAACAGTGGCATT                                        | 60         | 176             |             |                |
| 039                            | GCCGCTGTCATTAACGTAAC                                        |            |                 |             |                |
| TCONS_00054                    | AGCTGAGAACTTGGCAGACC                                        | 60         | 249             |             |                |
| 154                            | CTGTAACGTGCCAGAAACGC                                        |            |                 |             |                |
| Gallus_gallus_n<br>ewGene_1037 | TGAGCCCTGTGAGACATCTG<br>TCTTGCTTGTGCCTGCATAC                | 60         | 206             |             |                |
| Gallus_gallus_n<br>ewGene_720  | GGCCACATCCATGCTATCTT<br>GGCTTCTCAAAGTGCCTCAC                | 60         | 212             |             |                |
| β-actin                        | TGCCAGGGTACATTGTGGTA<br>TGCCTGACATCAAGGAGAAG                | 60         | 216             |             |                |
| LMEP                           | GCTAGCGCCTTGCCCGCGGCGGTTGCG<br>ACCGGTTTTTTTTTTTTTCTTTTCTTTG | 60         | 3150            |             | Overexpression |
