# Supplementary material for: Revealing the Regulatory Mechanism of lncRNA-LMEP on Melanin Deposition Based on High-Throughput Sequencing in Xichuan Chicken Skin
Source: MDPI journal article supplement (doi:10.3390/genes13112143), 2022-11-17
Supplement: s1 [file s1]

**Table S2.** Skin color characteristics of Xichuan black-bone chickens with YS and BS.

| Group | Sex    | Sample ID | Color Value | Analysis            |
|-------|--------|-----------|-------------|---------------------|
| YS    | Female | YS1       | 55.88       | RNA-seq and qRT-PCR |
| YS    | Female | YS2       | 58.14       | RNA-seq and qRT-PCR |
| YS    | Female | YS3       | 57.05       | RNA-seq and qRT-PCR |
| YS    | Female | YS4       | 56.26       | qRT-PCR             |
| YS    | Female | YS5       | 59.73       | qRT-PCR             |
| YS    | Female | YS6       | 58.42       | qRT-PCR             |
| BS    | Female | BS1       | 36.02       | RNA-seq and qRT-PCR |
| BS    | Female | BS2       | 37.83       | RNA-seq and qRT-PCR |
| BS    | Female | BS3       | 36.16       | RNA-seq and qRT-PCR |
| BS    | Female | BS4       | 38.96       | qRT-PCR             |
| BS    | Female | BS5       | 35.35       | qRT-PCR             |
| BS    | Female | BS6       | 35.42       | qRT-PCR             |

Note: YS represents the yellow skin group, and BS represents the black skin group. The smaller the numerical grade of the black color of the skin, the greater the yellow coloration.
