# Supplementary material for: Revealing the Regulatory Mechanism of lncRNA-LMEP on Melanin Deposition Based on High-Throughput Sequencing in Xichuan Chicken Skin
Source: MDPI journal article supplement (doi:10.3390/genes13112143), 2022-11-17
Supplement: s1 [file s1]

**Table S4.** Coding potential of LMEP

| Gene ID | Website | ORF Size | Ficket Score | Coding Probability | Coding Label |
|---------|---------|----------|--------------|--------------------|--------------|
| LMEP    | CPAT    | 315      | 0.5032       | 0.0042003214976823 | noncoding    |
|         | CPC     | 105      | 0.27991      | 0.0987826          | noncoding    |
