# Supplementary material for: Revealing the Regulatory Mechanism of lncRNA-LMEP on Melanin Deposition Based on High-Throughput Sequencing in Xichuan Chicken Skin
Source: Genes (Basel). 2022 Nov 17;13(11):2143. doi: 10.3390/genes13112143 (PMC9690664; doi:10.3390/genes13112143)
Supplement: Supplementary file 1 [file genes-13-02143-s001.zip]

Archive with 8 entries (8 files):
- figure S1.tif
- figure S2.tif
- figure S3.png
- Supplementary Table S1 .pdf
- Supplementary Table S2.pdf
- Supplementary Table S3.pdf
- Supplementary Table S4.pdf
- Supplementary Table S5.pdf
